# Supplementary material
Source: publisher figshare collection journal article supplement (https://acs.figshare.com/ndownloader/files/4127215)
Supplement: Supplementary file 1 [file 4127215]

 
data_Global
_publ_contact_author_name        'Prof. J. N. Moorthy'
_publ_contact_author_address     
;Departmet of chemistry
Indian Institute of Technology - Kanpur
Kanpur - 208 016
INDIA
;
_publ_contact_author_email       moorthy@iitk.ac.in
_publ_contact_author_phone       +915122597438
_publ_contact_author_fax         +915122597436
loop_
_publ_author_name
_publ_author_address

'Prof. J. N. Moorthy, '
;Departmet of chemistry
Indian Institute of Technology - Kanpur
Kanpur - 208 016
INDIA
;
'Alankriti Bajpai'
;Department of Chemistry
Indian Institute of Technology
Kanpur 208 016
INDIA
;
'P. Natarajan'
;Department of Chemistry
Indian Institute of Technology
Kanpur 208 016
INDIA
;

'Prof. P. Venugopalan'
;Department of Chemistry
Panjab University
Chandigrah 560017
INDIA
;

data_BX-B
 
_audit_creation_method            SHELXL-97 
_chemical_name_systematic 
; 
2,4-Bis(4-hydroxy-2,6-dimethylphenyl)-1,5-dimethylbenzene-benzene
; 
_chemical_name_common             2,4-Bis(4-hydroxy-2,6-dimethylphenyl)-1,5-dimethylbenzene
_chemical_melting_point           ? 
_chemical_formula_moiety          ? 
_chemical_formula_sum
 'C30 H32 O2'
_chemical_formula_weight          424.58
 
loop_
 _atom_type_symbol
 _atom_type_description
 _atom_type_scat_dispersion_real
 _atom_type_scat_dispersion_imag
 _atom_type_scat_source
 'C'  'C'   0.0033   0.0016
 'International Tables Vol C Tables 4.2.6.8 and 6.1.1.4'
 'H'  'H'   0.0000   0.0000
 'International Tables Vol C Tables 4.2.6.8 and 6.1.1.4'
 'O'  'O'   0.0106   0.0060
 'International Tables Vol C Tables 4.2.6.8 and 6.1.1.4'
 
_symmetry_cell_setting            ?
_symmetry_space_group_name_H-M    ?
 
loop_
 _symmetry_equiv_pos_as_xyz
 'x, y, z'
 '-x, y+1/2, -z+1/2'
 '-x, -y, -z'
 'x, -y-1/2, z-1/2'
 
_cell_length_a                    8.2485(12)
_cell_length_b                    18.038(3)
_cell_length_c                    18.437(3)
_cell_angle_alpha                 90.00
_cell_angle_beta                  98.360(3)
_cell_angle_gamma                 90.00
_cell_volume                      2714.0(7)
_cell_formula_units_Z             4
_cell_measurement_temperature     293(2)
_cell_measurement_reflns_used     ?
_cell_measurement_theta_min       ?
_cell_measurement_theta_max       ?
 
_exptl_crystal_description        ?
_exptl_crystal_colour             ?
_exptl_crystal_size_max           ?
_exptl_crystal_size_mid           ?
_exptl_crystal_size_min           ?
_exptl_crystal_density_meas       ?
_exptl_crystal_density_diffrn     1.039
_exptl_crystal_density_method     'not measured'
_exptl_crystal_F_000              912
_exptl_absorpt_coefficient_mu     0.063
_exptl_absorpt_correction_type    ?
_exptl_absorpt_correction_T_min   ?
_exptl_absorpt_correction_T_max   ?
_exptl_absorpt_process_details    ?
 
_exptl_special_details
;
 ?
;
 
_diffrn_ambient_temperature       293(2)
_diffrn_radiation_wavelength      0.71073
_diffrn_radiation_type            MoK\a
_diffrn_radiation_source          'fine-focus sealed tube'
_diffrn_radiation_monochromator   graphite
_diffrn_measurement_device_type   ?
_diffrn_measurement_method        ?
_diffrn_detector_area_resol_mean  ?
_diffrn_standards_number          ?
_diffrn_standards_interval_count  ?
_diffrn_standards_interval_time   ?
_diffrn_standards_decay_%         ?
_diffrn_reflns_number             19129
_diffrn_reflns_av_R_equivalents   0.0321
_diffrn_reflns_av_sigmaI/netI     0.0305
_diffrn_reflns_limit_h_min        -9
_diffrn_reflns_limit_h_max        9
_diffrn_reflns_limit_k_min        -21
_diffrn_reflns_limit_k_max        21
_diffrn_reflns_limit_l_min        -21
_diffrn_reflns_limit_l_max        21
_diffrn_reflns_theta_min          2.50
_diffrn_reflns_theta_max          25.00
_reflns_number_total              4742
_reflns_number_gt                 3006
_reflns_threshold_expression      >2sigma(I)
 
_computing_data_collection        ?
_computing_cell_refinement        ?
_computing_data_reduction         ?
_computing_structure_solution     ?
_computing_structure_refinement   'SHELXL-97 (Sheldrick, 1997)'
_computing_molecular_graphics     ?
_computing_publication_material   ?
 
_refine_special_details
;
 Refinement of F^2^ against ALL reflections.  The weighted R-factor wR and
 goodness of fit S are based on F^2^, conventional R-factors R are based
 on F, with F set to zero for negative F^2^. The threshold expression of
 F^2^ > 2sigma(F^2^) is used only for calculating R-factors(gt) etc. and is
 not relevant to the choice of reflections for refinement.  R-factors based
 on F^2^ are statistically about twice as large as those based on F, and R-
 factors based on ALL data will be even larger.
;
 
_refine_ls_structure_factor_coef  Fsqd
_refine_ls_matrix_type            full
_refine_ls_weighting_scheme       calc
_refine_ls_weighting_details
 'calc w=1/[\s^2^(Fo^2^)+(0.1626P)^2^+0.0000P] where P=(Fo^2^+2Fc^2^)/3'
_atom_sites_solution_primary      direct
_atom_sites_solution_secondary    difmap
_atom_sites_solution_hydrogens    geom
_refine_ls_hydrogen_treatment     mixed
_refine_ls_extinction_method      none
_refine_ls_extinction_coef        ?
_refine_ls_number_reflns          4742
_refine_ls_number_parameters      307
_refine_ls_number_restraints      38
_refine_ls_R_factor_all           0.1161
_refine_ls_R_factor_gt            0.0759
_refine_ls_wR_factor_ref          0.2447
_refine_ls_wR_factor_gt           0.2181
_refine_ls_goodness_of_fit_ref    1.039
_refine_ls_restrained_S_all       1.048
_refine_ls_shift/su_max           0.000
_refine_ls_shift/su_mean          0.000
 
loop_
 _atom_site_label
 _atom_site_type_symbol
 _atom_site_fract_x
 _atom_site_fract_y
 _atom_site_fract_z
 _atom_site_U_iso_or_equiv
 _atom_site_adp_type
 _atom_site_occupancy
 _atom_site_symmetry_multiplicity
 _atom_site_calc_flag
 _atom_site_refinement_flags
 _atom_site_disorder_assembly
 _atom_site_disorder_group
O1 O -0.0847(2) 0.03105(12) 0.55048(10) 0.0716(6) Uani 1 1 d . . .
H1A H -0.0308 0.0013 0.5303 0.107 Uiso 0.50 1 d PR . .
H1B H -0.1825 0.0443 0.5349 0.107 Uiso 0.50 1 d PR . .
O2 O 0.5921(2) 0.43790(10) 1.00957(13) 0.0784(7) Uani 1 1 d . . .
H2A H 0.5220 0.4696 0.9979 0.118 Uiso 0.50 1 d PR . .
H2B H 0.7004 0.4398 1.0166 0.118 Uiso 0.50 1 d PR . .
C1 C 0.1851(3) 0.07007(14) 0.84853(13) 0.0491(6) Uani 1 1 d . . .
C2 C 0.2555(3) 0.13799(13) 0.87108(13) 0.0478(6) Uani 1 1 d . . .
H2A H 0.2605 0.1747 0.8360 0.057 Uiso 1 1 calc R . .
C3 C 0.3185(3) 0.15344(13) 0.94361(13) 0.0454(6) Uani 1 1 d . . .
C4 C 0.3139(3) 0.09815(14) 0.99607(13) 0.0535(7) Uani 1 1 d . . .
C5 C 0.2417(4) 0.03049(15) 0.97342(14) 0.0622(8) Uani 1 1 d . . .
H5 H 0.2366 -0.0062 1.0084 0.075 Uiso 1 1 calc R . .
C6 C 0.1774(4) 0.01536(15) 0.90157(15) 0.0598(7) Uani 1 1 d . . .
C7 C 0.1013(5) -0.05990(18) 0.88130(19) 0.0861(11) Uani 1 1 d . . .
H7A H 0.1748 -0.0887 0.8568 0.129 Uiso 1 1 calc R . .
H7B H -0.0004 -0.0533 0.8494 0.129 Uiso 1 1 calc R . .
H7C H 0.0816 -0.0852 0.9250 0.129 Uiso 1 1 calc R . .
C8 C 0.3809(5) 0.10969(17) 1.07517(15) 0.0762(9) Uani 1 1 d . . .
H8A H 0.4885 0.1309 1.0790 0.114 Uiso 1 1 calc R . .
H8B H 0.3868 0.0629 1.1003 0.114 Uiso 1 1 calc R . .
H8C H 0.3103 0.1426 1.0970 0.114 Uiso 1 1 calc R . .
C9 C 0.1152(3) 0.05788(14) 0.76990(13) 0.0486(6) Uani 1 1 d . . .
C10 C -0.0511(3) 0.07079(18) 0.74675(15) 0.0640(8) Uani 1 1 d . . .
C11 C -0.1158(3) 0.06132(19) 0.67316(15) 0.0669(8) Uani 1 1 d . . .
H11 H -0.2264 0.0705 0.6577 0.080 Uiso 1 1 calc R . .
C12 C -0.0178(3) 0.03870(15) 0.62354(14) 0.0525(7) Uani 1 1 d . . .
C13 C 0.1444(3) 0.02458(15) 0.64558(14) 0.0547(7) Uani 1 1 d . . .
H13 H 0.2095 0.0082 0.6117 0.066 Uiso 1 1 calc R . .
C14 C 0.2134(3) 0.03457(15) 0.71879(14) 0.0531(7) Uani 1 1 d . . .
C15 C 0.3934(4) 0.0199(2) 0.74157(19) 0.0901(12) Uani 1 1 d . . .
H15A H 0.4430 0.0618 0.7682 0.135 Uiso 1 1 calc R . .
H15B H 0.4449 0.0118 0.6988 0.135 Uiso 1 1 calc R . .
H15C H 0.4070 -0.0234 0.7722 0.135 Uiso 1 1 calc R . .
C16 C -0.1599(4) 0.0958(3) 0.8010(2) 0.1148(16) Uani 1 1 d . . .
H16A H -0.2713 0.0823 0.7835 0.172 Uiso 1 1 calc R . .
H16B H -0.1524 0.1487 0.8066 0.172 Uiso 1 1 calc R . .
H16C H -0.1255 0.0725 0.8475 0.172 Uiso 1 1 calc R . .
C17 C 0.3917(3) 0.22837(13) 0.96279(13) 0.0451(6) Uani 1 1 d . . .
C18 C 0.5598(3) 0.23998(14) 0.96656(14) 0.0522(7) Uani 1 1 d . . .
C19 C 0.6249(3) 0.31041(14) 0.98323(16) 0.0556(7) Uani 1 1 d . . .
H19 H 0.7374 0.3178 0.9868 0.067 Uiso 1 1 calc R . .
C20 C 0.5255(3) 0.36851(13) 0.99432(15) 0.0513(7) Uani 1 1 d . . .
C21 C 0.3595(3) 0.35779(14) 0.99021(16) 0.0572(7) Uani 1 1 d . . .
H21 H 0.2922 0.3977 0.9974 0.069 Uiso 1 1 calc R . .
C22 C 0.2910(3) 0.28841(14) 0.97557(14) 0.0522(7) Uani 1 1 d . . .
C23 C 0.1097(4) 0.27816(19) 0.9723(2) 0.0857(11) Uani 1 1 d . . .
H23A H 0.0643 0.2599 0.9248 0.128 Uiso 1 1 calc R . .
H23B H 0.0599 0.3248 0.9809 0.128 Uiso 1 1 calc R . .
H23C H 0.0887 0.2432 1.0091 0.128 Uiso 1 1 calc R . .
C24 C 0.6708(4) 0.17768(18) 0.9516(2) 0.0890(11) Uani 1 1 d . . .
H24A H 0.7828 0.1936 0.9622 0.134 Uiso 1 1 calc R . .
H24B H 0.6468 0.1635 0.9010 0.134 Uiso 1 1 calc R . .
H24C H 0.6537 0.1360 0.9820 0.134 Uiso 1 1 calc R . .
C25 C 0.4218(12) 0.3048(5) 0.7586(5) 0.297(17) Uani 0.56 1 d PGU A 1
H25A H 0.5351 0.3091 0.7690 0.357 Uiso 0.56 1 calc PR A 1
C26 C 0.3219(17) 0.3513(4) 0.7928(4) 0.177(6) Uani 0.56 1 d PGU A 1
H26A H 0.3685 0.3867 0.8262 0.213 Uiso 0.56 1 calc PR A 1
C27 C 0.1525(16) 0.3448(5) 0.7773(5) 0.172(6) Uani 0.56 1 d PGU A 1
H27A H 0.0857 0.3760 0.8002 0.207 Uiso 0.56 1 calc PR A 1
C28 C 0.0829(12) 0.2919(6) 0.7275(6) 0.328(18) Uani 0.56 1 d PGU A 1
H28A H -0.0304 0.2876 0.7171 0.394 Uiso 0.56 1 calc PR A 1
C29 C 0.1828(17) 0.2454(4) 0.6932(4) 0.171(7) Uani 0.56 1 d PGU A 1
H29A H 0.1362 0.2099 0.6599 0.205 Uiso 0.56 1 calc PR A 1
C30 C 0.3522(16) 0.2518(4) 0.7088(4) 0.218(11) Uani 0.56 1 d PGU A 1
H30A H 0.4190 0.2207 0.6858 0.262 Uiso 0.56 1 calc PR A 1
C25A C 0.412(2) 0.3217(10) 0.7743(10) 0.169(16) Uiso 0.26 1 d PG B 2
H25B H 0.3797 0.3581 0.8049 0.202 Uiso 0.26 1 calc PR B 2
C26A C 0.578(2) 0.3094(9) 0.7725(9) 0.113(6) Uiso 0.26 1 d PGU B 2
H26B H 0.6563 0.3376 0.8018 0.135 Uiso 0.26 1 calc PR B 2
C27A C 0.6271(13) 0.2550(9) 0.7269(8) 0.291(17) Uiso 0.26 1 d PGU B 2
H27B H 0.7379 0.2468 0.7257 0.349 Uiso 0.26 1 calc PR B 2
C28A C 0.5102(16) 0.2129(6) 0.6831(6) 0.072(3) Uiso 0.26 1 d PGU B 2
H28B H 0.5430 0.1765 0.6525 0.087 Uiso 0.26 1 calc PR B 2
C29A C 0.3445(14) 0.2252(9) 0.6849(9) 0.098(6) Uiso 0.26 1 d PG B 2
H29B H 0.2664 0.1970 0.6555 0.117 Uiso 0.26 1 calc PR B 2
C30A C 0.2956(16) 0.2796(12) 0.7305(12) 0.36(4) Uiso 0.26 1 d PG B 2
H30B H 0.1847 0.2878 0.7317 0.432 Uiso 0.26 1 calc PR B 2
C25B C 0.418(2) 0.2119(9) 0.6817(9) 0.065(4) Uiso 0.18 1 d PG C 3
H25C H 0.4657 0.1765 0.6547 0.078 Uiso 0.18 1 calc PR C 3
C26B C 0.249(2) 0.2187(9) 0.6741(8) 0.099(9) Uiso 0.18 1 d PG C 3
H26C H 0.1828 0.1878 0.6420 0.119 Uiso 0.18 1 calc PR C 3
C27B C 0.1783(15) 0.2717(9) 0.7144(9) 0.085(7) Uiso 0.18 1 d PG C 3
H27C H 0.0649 0.2762 0.7093 0.102 Uiso 0.18 1 calc PR C 3
C28B C 0.2772(18) 0.3179(8) 0.7624(9) 0.070(6) Uiso 0.18 1 d PG C 3
H28C H 0.2300 0.3533 0.7894 0.084 Uiso 0.18 1 calc PR C 3
C29B C 0.4467(17) 0.3111(9) 0.7700(10) 0.073(7) Uiso 0.18 1 d PG C 3
H29C H 0.5129 0.3420 0.8021 0.088 Uiso 0.18 1 calc PR C 3
C30B C 0.5173(15) 0.2581(10) 0.7297(10) 0.163(16) Uiso 0.18 1 d PG C 3
H30C H 0.6307 0.2536 0.7348 0.195 Uiso 0.18 1 calc PR C 3
 
loop_
 _atom_site_aniso_label
 _atom_site_aniso_U_11
 _atom_site_aniso_U_22
 _atom_site_aniso_U_33
 _atom_site_aniso_U_23
 _atom_site_aniso_U_13
 _atom_site_aniso_U_12
O1 0.0635(12) 0.1001(16) 0.0457(11) -0.0178(10) -0.0106(9) 0.0119(11)
O2 0.0620(13) 0.0449(11) 0.1185(18) -0.0024(11) -0.0197(12) -0.0091(9)
C1 0.0502(15) 0.0484(15) 0.0468(14) -0.0026(11) 0.0006(11) -0.0005(11)
C2 0.0538(15) 0.0456(14) 0.0427(13) -0.0010(11) 0.0024(11) -0.0009(11)
C3 0.0476(14) 0.0436(14) 0.0445(13) -0.0043(10) 0.0045(11) 0.0004(11)
C4 0.0679(17) 0.0476(15) 0.0431(14) -0.0034(11) 0.0013(12) -0.0038(12)
C5 0.090(2) 0.0464(16) 0.0466(15) 0.0034(11) -0.0002(14) -0.0103(14)
C6 0.0736(19) 0.0474(15) 0.0548(16) -0.0060(12) -0.0025(13) -0.0070(13)
C7 0.117(3) 0.0595(19) 0.075(2) -0.0019(16) -0.011(2) -0.0259(18)
C8 0.112(3) 0.0655(19) 0.0454(16) -0.0012(13) -0.0060(16) -0.0170(17)
C9 0.0497(15) 0.0507(14) 0.0431(14) -0.0064(11) -0.0011(11) -0.0009(11)
C10 0.0501(16) 0.089(2) 0.0510(16) -0.0162(15) 0.0010(12) 0.0055(14)
C11 0.0431(15) 0.100(2) 0.0550(17) -0.0190(15) -0.0029(12) 0.0116(15)
C12 0.0470(15) 0.0648(17) 0.0425(14) -0.0101(12) -0.0044(11) 0.0055(12)
C13 0.0496(15) 0.0694(18) 0.0452(14) -0.0059(12) 0.0074(12) 0.0091(13)
C14 0.0438(14) 0.0611(16) 0.0516(15) -0.0086(12) -0.0019(11) 0.0044(12)
C15 0.0557(19) 0.135(3) 0.074(2) -0.018(2) -0.0068(16) 0.024(2)
C16 0.065(2) 0.209(5) 0.069(2) -0.043(3) 0.0050(17) 0.032(3)
C17 0.0481(14) 0.0447(14) 0.0414(13) -0.0028(10) 0.0024(10) -0.0032(11)
C18 0.0467(15) 0.0522(15) 0.0574(16) -0.0026(12) 0.0060(11) 0.0045(12)
C19 0.0392(14) 0.0539(16) 0.0724(18) -0.0005(13) 0.0037(12) -0.0060(12)
C20 0.0459(15) 0.0404(14) 0.0632(16) -0.0014(11) -0.0068(12) -0.0030(11)
C21 0.0490(16) 0.0446(14) 0.0743(19) -0.0121(13) -0.0032(13) 0.0059(11)
C22 0.0441(14) 0.0511(15) 0.0591(16) -0.0066(12) 0.0002(11) -0.0004(12)
C23 0.0476(18) 0.072(2) 0.137(3) -0.026(2) 0.0118(18) -0.0047(15)
C24 0.066(2) 0.066(2) 0.140(3) -0.018(2) 0.031(2) 0.0089(16)
C25 0.70(5) 0.113(11) 0.114(11) 0.099(10) 0.16(2) 0.068(19)
C26 0.286(18) 0.169(12) 0.070(6) 0.064(7) 0.005(9) -0.079(13)
C27 0.235(16) 0.125(9) 0.140(10) 0.065(7) -0.030(10) -0.040(9)
C28 0.263(17) 0.35(3) 0.42(3) 0.36(3) 0.20(2) 0.183(19)
C29 0.33(2) 0.089(8) 0.078(6) 0.058(7) -0.010(10) -0.039(10)
C30 0.57(4) 0.042(5) 0.037(4) 0.011(4) 0.030(10) -0.044(9)
 
_geom_special_details
;
 All esds (except the esd in the dihedral angle between two l.s. planes)
 are estimated using the full covariance matrix.  The cell esds are taken
 into account individually in the estimation of esds in distances, angles
 and torsion angles; correlations between esds in cell parameters are only
 used when they are defined by crystal symmetry.  An approximate (isotropic)
 treatment of cell esds is used for estimating esds involving l.s. planes.
;
 
loop_
 _geom_bond_atom_site_label_1
 _geom_bond_atom_site_label_2
 _geom_bond_distance
 _geom_bond_site_symmetry_2
 _geom_bond_publ_flag
O1 C12 1.386(3) . ?
O1 H1A 0.8199 . ?
O1 H1B 0.8500 . ?
O2 C20 1.379(3) . ?
O2 H2A 0.8199 . ?
O2 H2B 0.8846 . ?
C1 C2 1.393(3) . ?
C1 C6 1.397(4) . ?
C1 C9 1.496(3) . ?
C2 C3 1.391(3) . ?
C2 H2A 0.9300 . ?
C3 C4 1.394(3) . ?
C3 C17 1.501(3) . ?
C4 C5 1.395(4) . ?
C4 C8 1.497(4) . ?
C5 C6 1.381(4) . ?
C5 H5 0.9300 . ?
C6 C7 1.519(4) . ?
C7 H7A 0.9600 . ?
C7 H7B 0.9600 . ?
C7 H7C 0.9600 . ?
C8 H8A 0.9600 . ?
C8 H8B 0.9600 . ?
C8 H8C 0.9600 . ?
C9 C14 1.394(4) . ?
C9 C10 1.396(4) . ?
C10 C11 1.394(4) . ?
C10 C16 1.507(4) . ?
C11 C12 1.368(4) . ?
C11 H11 0.9300 . ?
C12 C13 1.365(4) . ?
C13 C14 1.398(4) . ?
C13 H13 0.9300 . ?
C14 C15 1.507(4) . ?
C15 H15A 0.9600 . ?
C15 H15B 0.9600 . ?
C15 H15C 0.9600 . ?
C16 H16A 0.9600 . ?
C16 H16B 0.9600 . ?
C16 H16C 0.9600 . ?
C17 C18 1.395(3) . ?
C17 C22 1.405(3) . ?
C18 C19 1.396(4) . ?
C18 C24 1.500(4) . ?
C19 C20 1.364(4) . ?
C19 H19 0.9300 . ?
C20 C21 1.374(4) . ?
C21 C22 1.383(4) . ?
C21 H21 0.9300 . ?
C22 C23 1.500(4) . ?
C23 H23A 0.9600 . ?
C23 H23B 0.9600 . ?
C23 H23C 0.9600 . ?
C24 H24A 0.9600 . ?
C24 H24B 0.9600 . ?
C24 H24C 0.9600 . ?
C25 C26 1.3900 . ?
C25 C30 1.3900 . ?
C25 H25A 0.9300 . ?
C26 C27 1.3900 . ?
C26 H26A 0.9300 . ?
C27 C28 1.3900 . ?
C27 H27A 0.9300 . ?
C28 C29 1.3900 . ?
C28 H28A 0.9300 . ?
C29 C30 1.3900 . ?
C29 H29A 0.9300 . ?
C30 H30A 0.9300 . ?
C25A C26A 1.3900 . ?
C25A C30A 1.3900 . ?
C25A H25B 0.9300 . ?
C26A C27A 1.3900 . ?
C26A H26B 0.9300 . ?
C27A C28A 1.3900 . ?
C27A H27B 0.9300 . ?
C28A C29A 1.3900 . ?
C28A H28B 0.9300 . ?
C29A C30A 1.3900 . ?
C29A H29B 0.9300 . ?
C30A H30B 0.9300 . ?
C25B C26B 1.3900 . ?
C25B C30B 1.3900 . ?
C25B H25C 0.9300 . ?
C26B C27B 1.3900 . ?
C26B H26C 0.9300 . ?
C27B C28B 1.3900 . ?
C27B H27C 0.9300 . ?
C28B C29B 1.3900 . ?
C28B H28C 0.9300 . ?
C29B C30B 1.3900 . ?
C29B H29C 0.9300 . ?
C30B H30C 0.9300 . ?
 
loop_
 _geom_angle_atom_site_label_1
 _geom_angle_atom_site_label_2
 _geom_angle_atom_site_label_3
 _geom_angle
 _geom_angle_site_symmetry_1
 _geom_angle_site_symmetry_3
 _geom_angle_publ_flag
C12 O1 H1A 109.9 . . ?
C12 O1 H1B 121.6 . . ?
H1A O1 H1B 125.5 . . ?
C20 O2 H2A 109.6 . . ?
C20 O2 H2B 115.4 . . ?
H2A O2 H2B 132.1 . . ?
C2 C1 C6 118.1(2) . . ?
C2 C1 C9 120.2(2) . . ?
C6 C1 C9 121.6(2) . . ?
C3 C2 C1 123.0(2) . . ?
C3 C2 H2A 118.5 . . ?
C1 C2 H2A 118.5 . . ?
C2 C3 C4 118.7(2) . . ?
C2 C3 C17 119.2(2) . . ?
C4 C3 C17 122.1(2) . . ?
C3 C4 C5 118.2(2) . . ?
C3 C4 C8 122.2(2) . . ?
C5 C4 C8 119.6(2) . . ?
C6 C5 C4 123.2(2) . . ?
C6 C5 H5 118.4 . . ?
C4 C5 H5 118.4 . . ?
C5 C6 C1 118.8(2) . . ?
C5 C6 C7 120.0(3) . . ?
C1 C6 C7 121.2(2) . . ?
C6 C7 H7A 109.5 . . ?
C6 C7 H7B 109.5 . . ?
H7A C7 H7B 109.5 . . ?
C6 C7 H7C 109.5 . . ?
H7A C7 H7C 109.5 . . ?
H7B C7 H7C 109.5 . . ?
C4 C8 H8A 109.5 . . ?
C4 C8 H8B 109.5 . . ?
H8A C8 H8B 109.5 . . ?
C4 C8 H8C 109.5 . . ?
H8A C8 H8C 109.5 . . ?
H8B C8 H8C 109.5 . . ?
C14 C9 C10 119.0(2) . . ?
C14 C9 C1 121.3(2) . . ?
C10 C9 C1 119.6(2) . . ?
C11 C10 C9 119.8(2) . . ?
C11 C10 C16 120.1(3) . . ?
C9 C10 C16 120.1(2) . . ?
C12 C11 C10 120.5(2) . . ?
C12 C11 H11 119.8 . . ?
C10 C11 H11 119.8 . . ?
C13 C12 C11 120.4(2) . . ?
C13 C12 O1 120.3(2) . . ?
C11 C12 O1 119.3(2) . . ?
C12 C13 C14 120.5(2) . . ?
C12 C13 H13 119.8 . . ?
C14 C13 H13 119.8 . . ?
C9 C14 C13 119.8(2) . . ?
C9 C14 C15 120.7(2) . . ?
C13 C14 C15 119.5(2) . . ?
C14 C15 H15A 109.5 . . ?
C14 C15 H15B 109.5 . . ?
H15A C15 H15B 109.5 . . ?
C14 C15 H15C 109.5 . . ?
H15A C15 H15C 109.5 . . ?
H15B C15 H15C 109.5 . . ?
C10 C16 H16A 109.5 . . ?
C10 C16 H16B 109.5 . . ?
H16A C16 H16B 109.5 . . ?
C10 C16 H16C 109.5 . . ?
H16A C16 H16C 109.5 . . ?
H16B C16 H16C 109.5 . . ?
C18 C17 C22 118.9(2) . . ?
C18 C17 C3 120.6(2) . . ?
C22 C17 C3 120.4(2) . . ?
C17 C18 C19 119.7(2) . . ?
C17 C18 C24 120.5(2) . . ?
C19 C18 C24 119.8(2) . . ?
C20 C19 C18 120.8(2) . . ?
C20 C19 H19 119.6 . . ?
C18 C19 H19 119.6 . . ?
C19 C20 C21 120.0(2) . . ?
C19 C20 O2 119.8(2) . . ?
C21 C20 O2 120.2(2) . . ?
C20 C21 C22 120.9(2) . . ?
C20 C21 H21 119.6 . . ?
C22 C21 H21 119.6 . . ?
C21 C22 C17 119.7(2) . . ?
C21 C22 C23 119.7(2) . . ?
C17 C22 C23 120.6(2) . . ?
C22 C23 H23A 109.5 . . ?
C22 C23 H23B 109.5 . . ?
H23A C23 H23B 109.5 . . ?
C22 C23 H23C 109.5 . . ?
H23A C23 H23C 109.5 . . ?
H23B C23 H23C 109.5 . . ?
C18 C24 H24A 109.5 . . ?
C18 C24 H24B 109.5 . . ?
H24A C24 H24B 109.5 . . ?
C18 C24 H24C 109.5 . . ?
H24A C24 H24C 109.5 . . ?
H24B C24 H24C 109.5 . . ?
C26 C25 C30 120.0 . . ?
C26 C25 H25A 120.0 . . ?
C30 C25 H25A 120.0 . . ?
C25 C26 C27 120.0 . . ?
C25 C26 H26A 120.0 . . ?
C27 C26 H26A 120.0 . . ?
C28 C27 C26 120.0 . . ?
C28 C27 H27A 120.0 . . ?
C26 C27 H27A 120.0 . . ?
C27 C28 C29 120.0 . . ?
C27 C28 H28A 120.0 . . ?
C29 C28 H28A 120.0 . . ?
C30 C29 C28 120.0 . . ?
C30 C29 H29A 120.0 . . ?
C28 C29 H29A 120.0 . . ?
C29 C30 C25 120.0 . . ?
C29 C30 H30A 120.0 . . ?
C25 C30 H30A 120.0 . . ?
C26A C25A C30A 120.0 . . ?
C26A C25A H25B 120.0 . . ?
C30A C25A H25B 120.0 . . ?
C27A C26A C25A 120.0 . . ?
C27A C26A H26B 120.0 . . ?
C25A C26A H26B 120.0 . . ?
C28A C27A C26A 120.0 . . ?
C28A C27A H27B 120.0 . . ?
C26A C27A H27B 120.0 . . ?
C27A C28A C29A 120.0 . . ?
C27A C28A H28B 120.0 . . ?
C29A C28A H28B 120.0 . . ?
C30A C29A C28A 120.0 . . ?
C30A C29A H29B 120.0 . . ?
C28A C29A H29B 120.0 . . ?
C29A C30A C25A 120.0 . . ?
C29A C30A H30B 120.0 . . ?
C25A C30A H30B 120.0 . . ?
C26B C25B C30B 120.0 . . ?
C26B C25B H25C 120.0 . . ?
C30B C25B H25C 120.0 . . ?
C27B C26B C25B 120.0 . . ?
C27B C26B H26C 120.0 . . ?
C25B C26B H26C 120.0 . . ?
C26B C27B C28B 120.0 . . ?
C26B C27B H27C 120.0 . . ?
C28B C27B H27C 120.0 . . ?
C29B C28B C27B 120.0 . . ?
C29B C28B H28C 120.0 . . ?
C27B C28B H28C 120.0 . . ?
C30B C29B C28B 120.0 . . ?
C30B C29B H29C 120.0 . . ?
C28B C29B H29C 120.0 . . ?
C29B C30B C25B 120.0 . . ?
C29B C30B H30C 120.0 . . ?
C25B C30B H30C 120.0 . . ?
 
_diffrn_measured_fraction_theta_max    0.992
_diffrn_reflns_theta_full              25.00
_diffrn_measured_fraction_theta_full   0.992
_refine_diff_density_max    0.560
_refine_diff_density_min   -0.226
_refine_diff_density_rms    0.058
#END
